# Supplementary material for: Impact of the COVID‐19 pandemic on HIV prevention and care services among key populations across 15 cities in India: a longitudinal assessment of clinic‐based data
Source: PubMed Central journal article supplement (PMC9273869; doi:10.1002/jia2.25960), 2022-07-11

**Supplementary Figure 1** Percentage difference in any service utilization among unique integrated care center (ICC) clients compared to January/February 2020

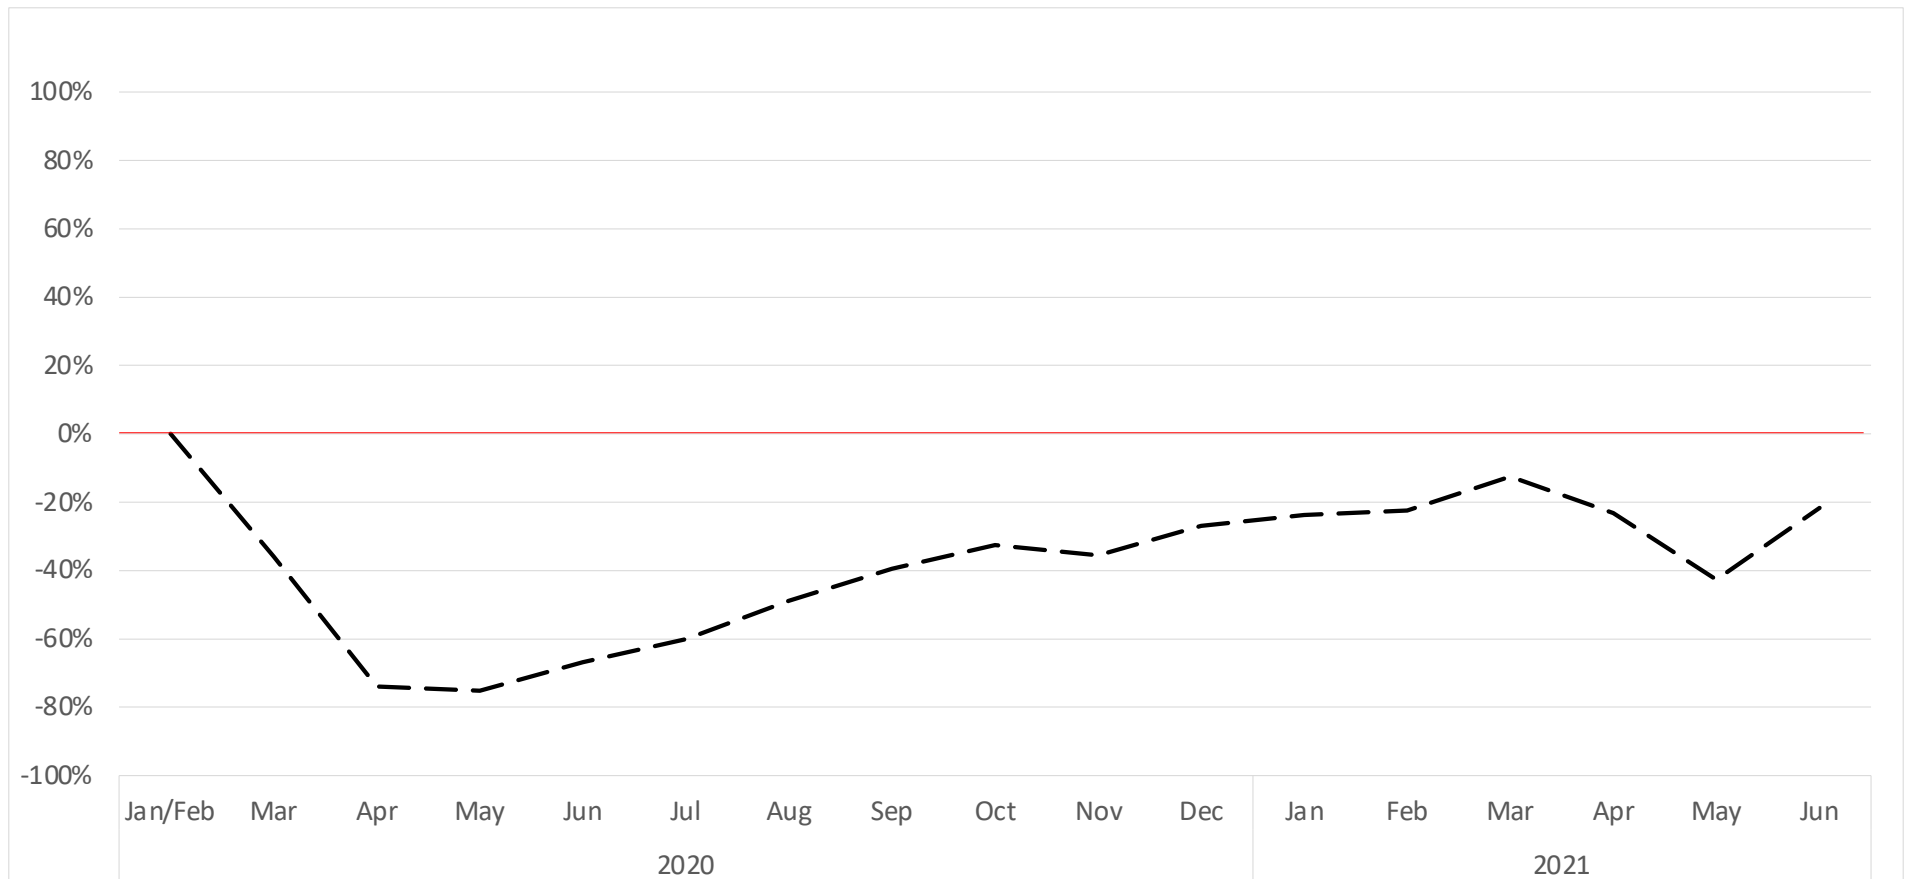

Supplement: JIA2-25-e25960-s002.pdf [file JIA2-25-e25960-s002.pdf]
